# Supplementary material for: Synthesis and Biological Evaluation of a Novel 18F-Labeled Radiotracer for PET Imaging of the Adenosine A2A Receptor
Source: PubMed Central journal article supplement (PMC7865263; doi:10.3390/ijms22031182), 2021-01-25
Supplement: ijms-22-01182-s001.pdf [file ijms-22-01182-s001.pdf]

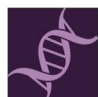

Supplementary Materials

# Synthesis and Biological Evaluation of a Novel $^{18}\text{F}$ -Labeled Radiotracer for PET Imaging of the Adenosine $\text{A}_{2\text{A}}$ Receptor

Thu Hang Lai <sup>1,2,\*,\dagger</sup>, Magali Toussaint <sup>1,\*,\dagger</sup>, Rodrigo Teodoro <sup>1,\dagger</sup>, Sladjana Dukić-Stefanović <sup>1</sup>, Mathias Kranz <sup>1,3,4</sup>, Winnie Deuther-Conrad <sup>1</sup>, Rareş-Petru Moldovan <sup>1</sup> and Peter Brust <sup>1</sup>

<sup>1</sup> Helmholtz-Zentrum Dresden-Rossendorf (HZDR), Department of Neuroradiopharmaceuticals, Institute of Radiopharmaceutical Cancer Research, Research site Leipzig, 04318 Leipzig, Germany; r.teodoro@hzdr.de (R.T.); s.dukic-stefanovic@hzdr.de (S.D.-S.); mathias.kranz@uit.no (M.K.); w.deuther-conrad@hzdr.de (W.D.-C.); r.moldovan@hzdr.de (R.-P.M.); p.brust@hzdr.de (P.B.)

<sup>2</sup> Department of Research and Development, ROTOP Pharmaka Ltd., 01328 Dresden, Germany

<sup>3</sup> PET Imaging Center, University Hospital of North Norway (UNN), 9009 Tromsø, Norway

<sup>4</sup> Nuclear Medicine and Radiation Biology Research Group, The Arctic University of Norway, 9009 Tromsø, Norway

\* Correspondence: t.lai@hzdr.de (T.H.L.); m.toussaint@hzdr.de (M.T.); Tel.: +49-341-234-179-4635 (T.H.L.); +49-341-234-179-4616 (M.T.)

\dagger These authors contributed equally to the work.

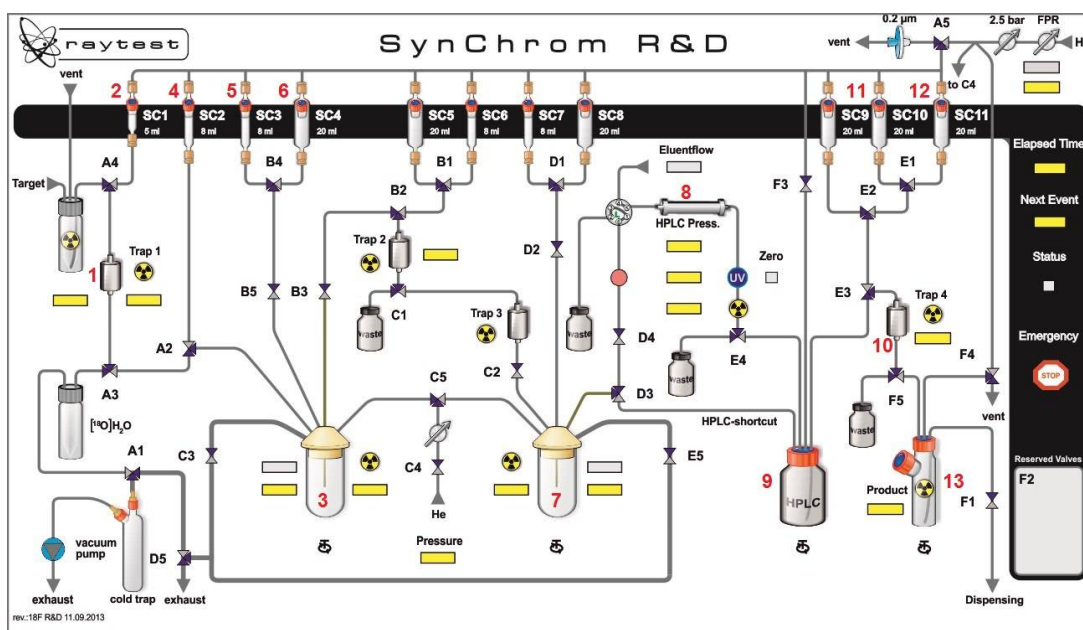

**Figure S1:** Scheme of the *raytest* *SynChrom* R&D synthesis module for the automated radiosynthesis of [ $^{18}\text{F}$ ]TOZ1 with (1) Sep-Pak<sup>®</sup> Accell Plus QMA Plus Light cartridge, (2)  $\text{K}_2\text{CO}_3$  (0.9 mg in 0.2 mL  $\text{H}_2\text{O}$ ) and  $\text{K}_{222}$  (5.6 mg in 0.8 mL MeCN), (3) 1<sup>st</sup> reactor, (4) 1.5 mL MeCN, (5) precursor 9 (0.5 mg in 0.6 mL DMSO), (6) 0.4 mL MeCN and 3 mL  $\text{H}_2\text{O}$ , (7) 2<sup>nd</sup> reactor, (8) Reprisil-Pur C18-AQ column (36% MeCN/ $\text{H}_2\text{O}$ /0.05% TFA, flow rate of 4 mL/min), (9) 30 mL water, (10) Sep-Pak<sup>®</sup> C18 light cartridge, (11) 2 mL  $\text{H}_2\text{O}$ , (12) 1.2 mL EtOH, (13) product vial.

### 6-Fluoro-*N*-(4-methoxy-7-morpholinobenzo[*d*]thiazol-2-yl)nicotinamide (TOZ1)

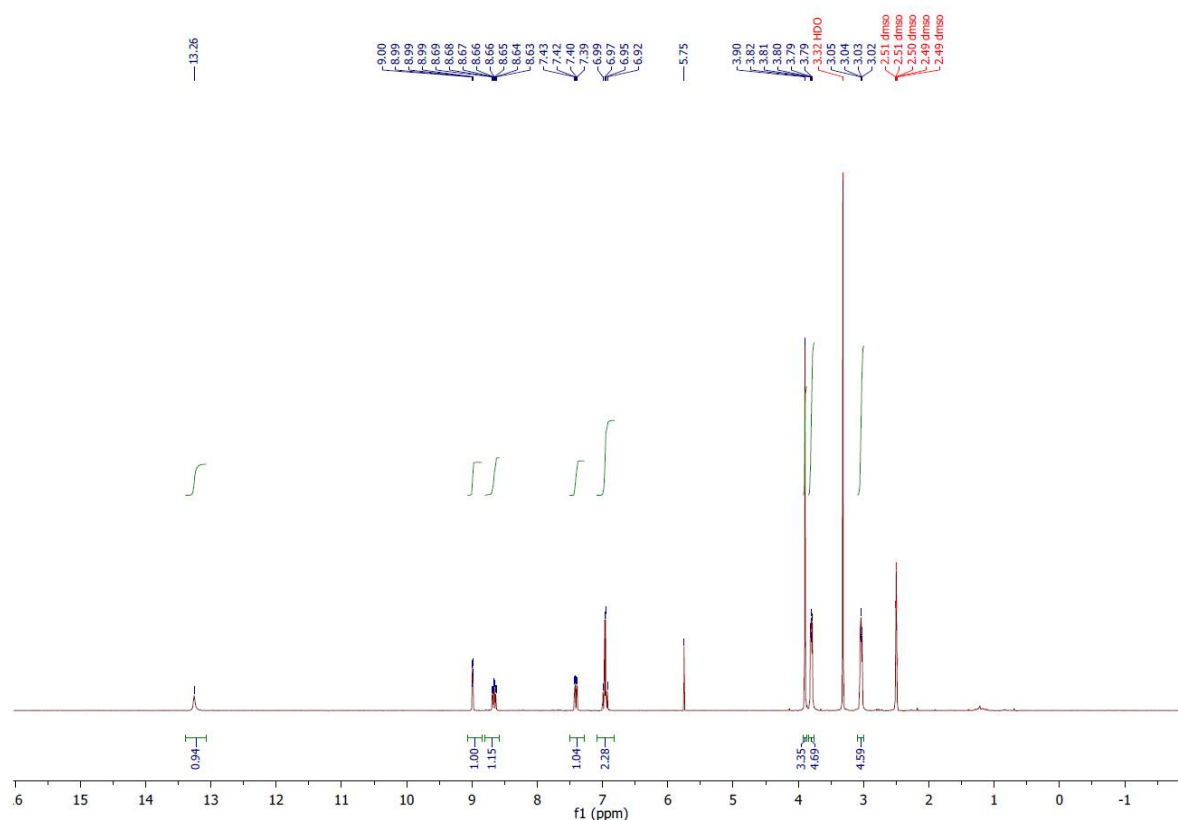

Figure S2: <sup>1</sup>H-NMR of TOZ1.

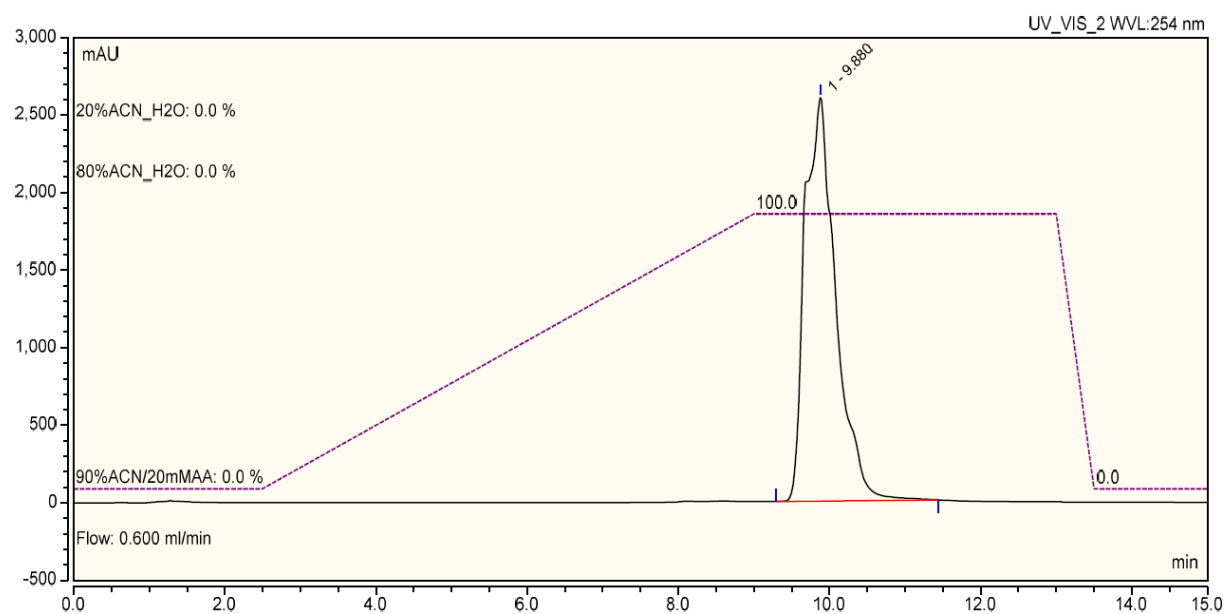

Figure S3: LC-MS chromatogram of TOZ1.

## 2-Fluoro-N-(4-methoxy-7-morpholinobenzo[d]thiazol-2-yl)nicotinamide (TOZ2)

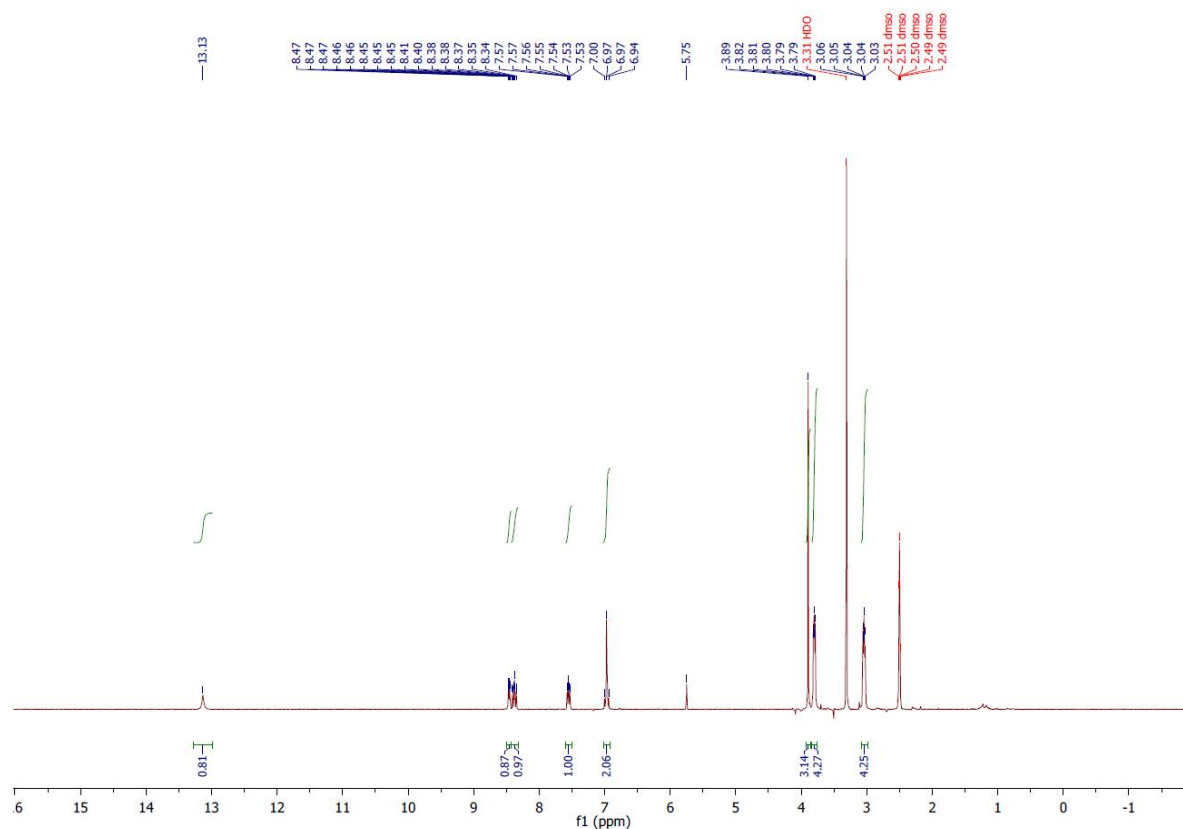

Figure S4: <sup>1</sup>H-NMR of TOZ2.

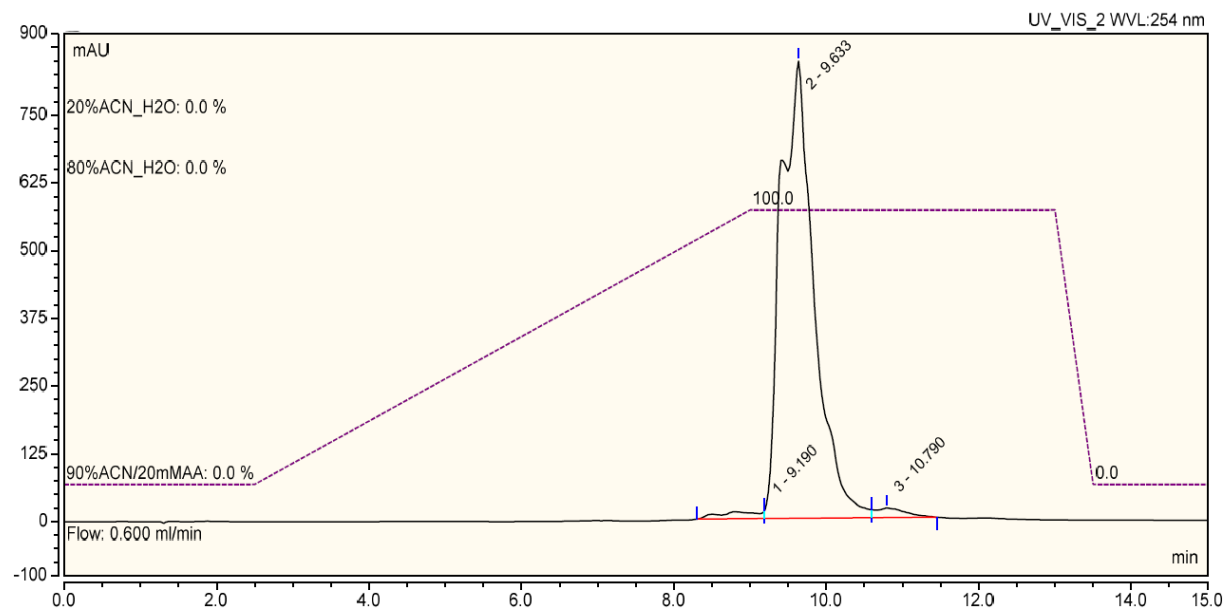

Figure S5: LC-MS chromatogram of TOZ2.

## 2-Fluoro-*N*-(4-methoxy-7-morpholinobenzo[*d*]thiazol-2-yl)isonicotinamide (TOZ3)

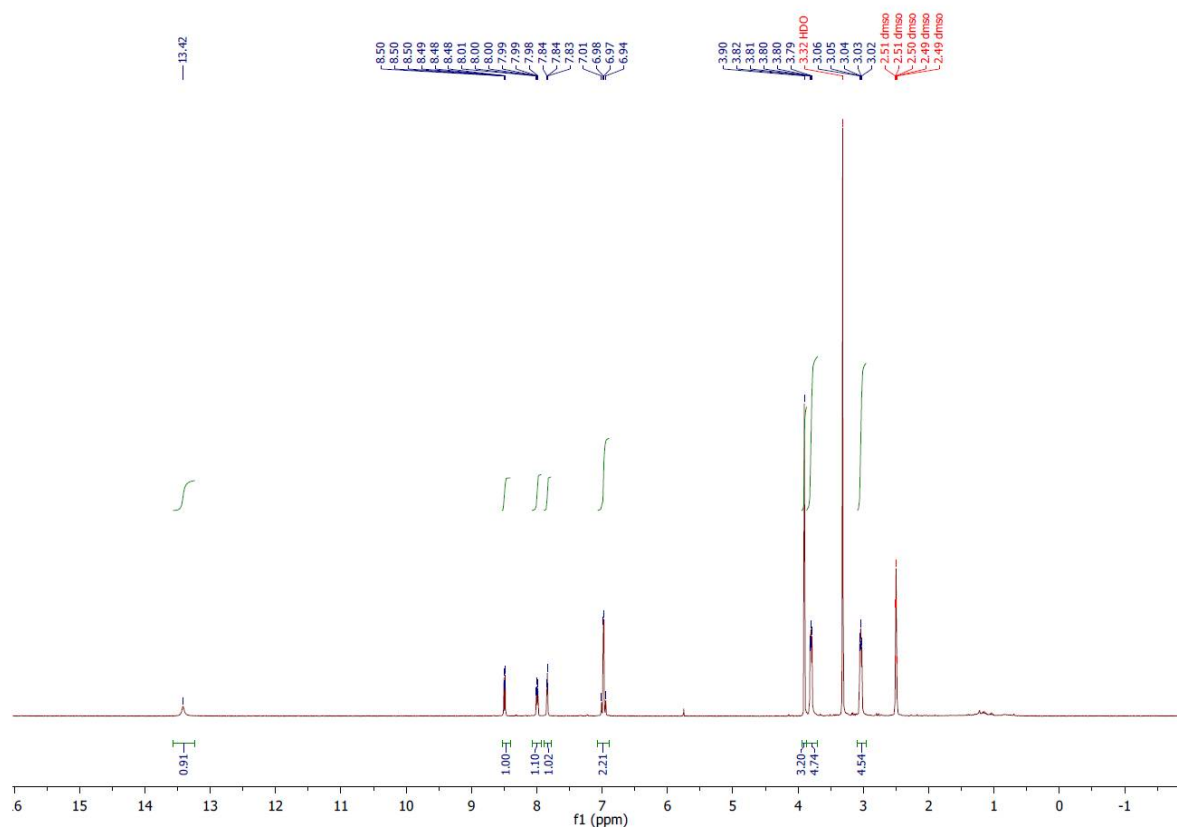

Figure S6: <sup>1</sup>H-NMR of TOZ3.

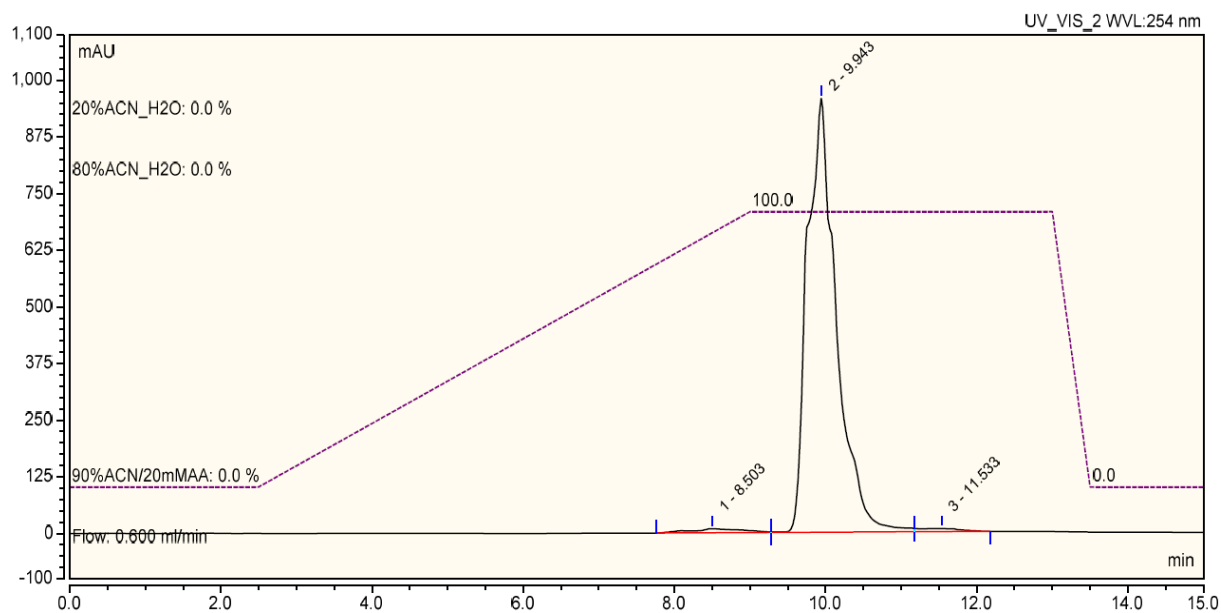

Figure S7: LC-MS chromatogram of TOZ3.

# 6-Fluoro-*N*-(4-methoxy-7-morpholinobenzo[*d*]thiazol-2-yl)picolinamide (TOZ4)

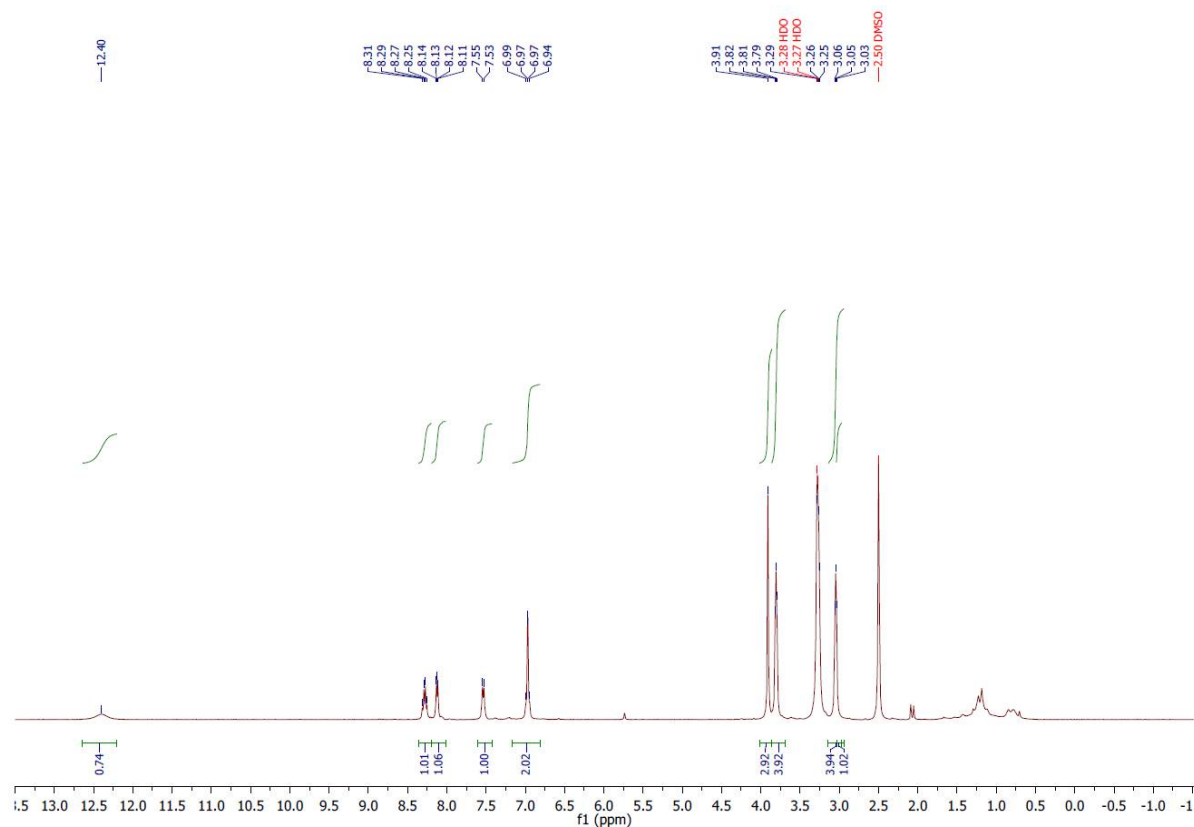

Figure S8: <sup>1</sup>H-NMR of TOZ4.

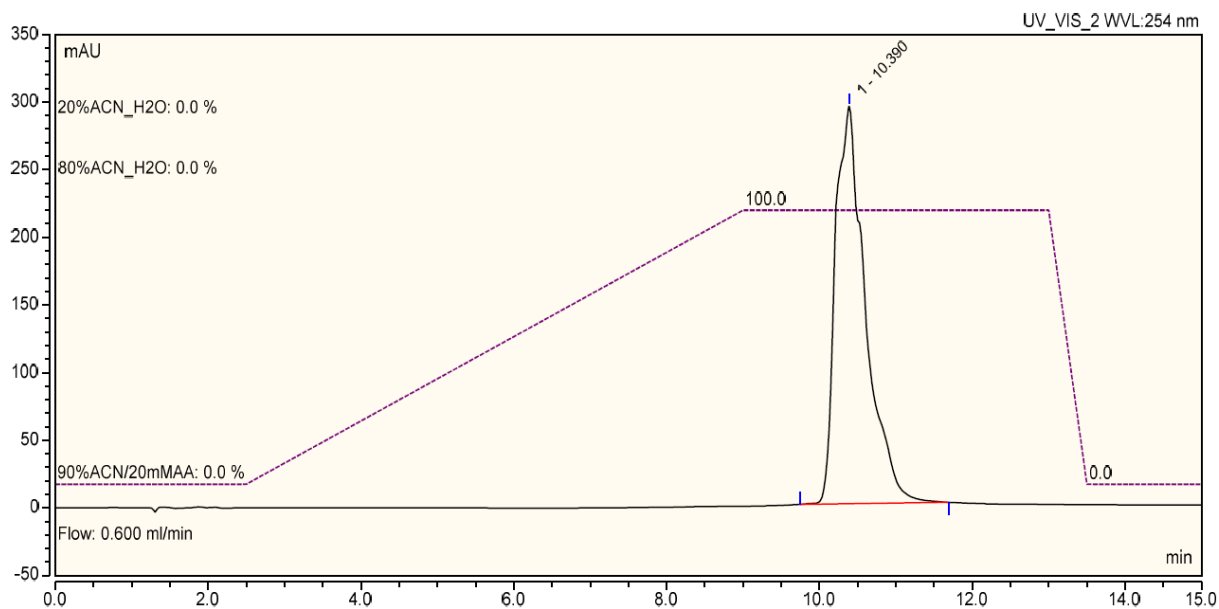

Figure S9: LC-MS chromatogram of TOZ4.

### 4-Fluoro-*N*-(4-methoxy-7-morpholinobenzo[*d*]thiazol-2-yl)benzamide (TOZ5)

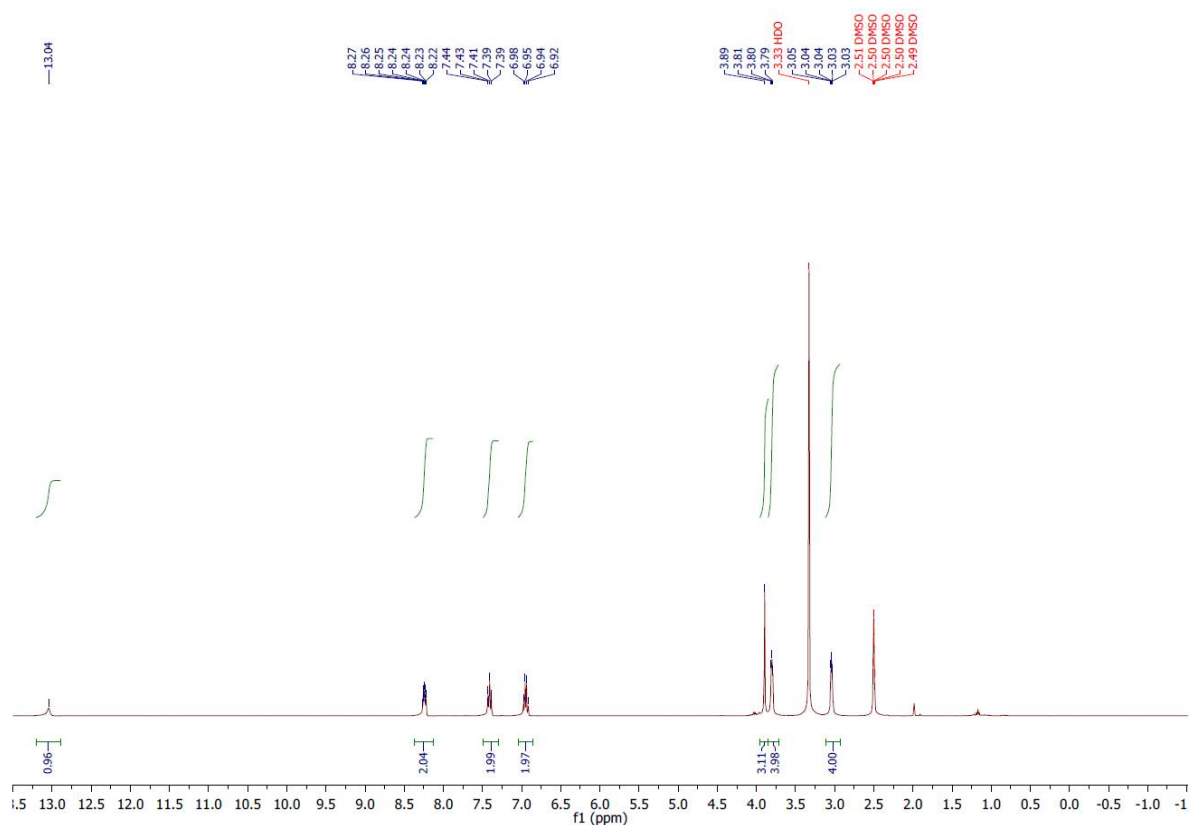

Figure S10: <sup>1</sup>H-NMR of TOZ5.

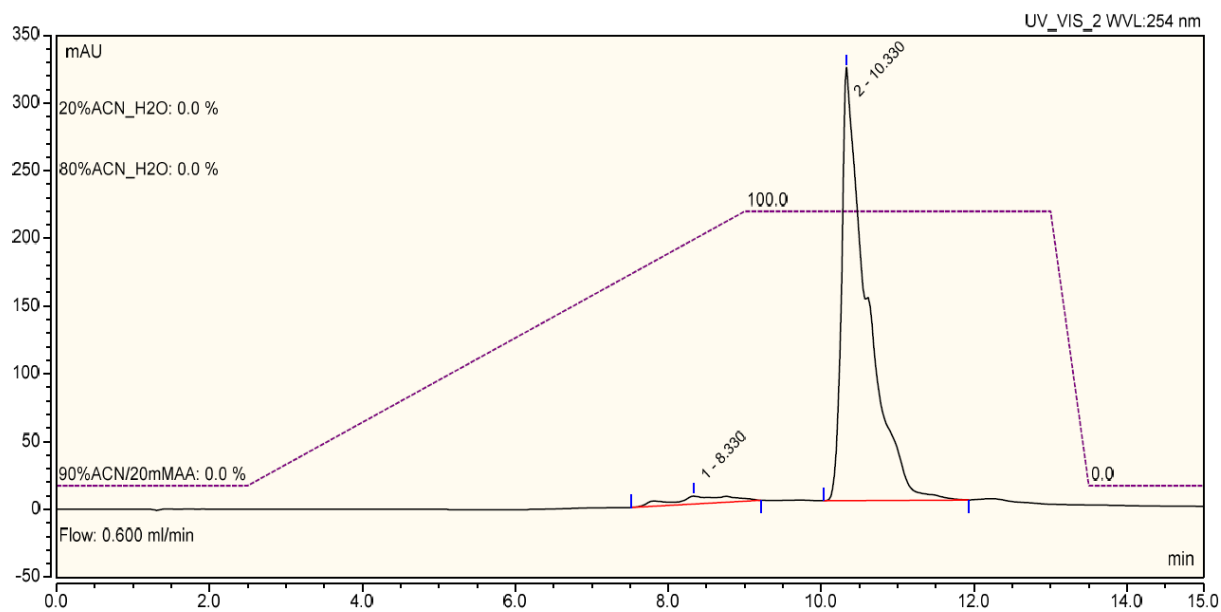

Figure S11: LC-MS chromatogram of TOZ5.

## 2-Fluoro-*N*-(4-methoxy-7-morpholinobenzo[*d*]thiazol-2-yl)benzamide (TOZ6)

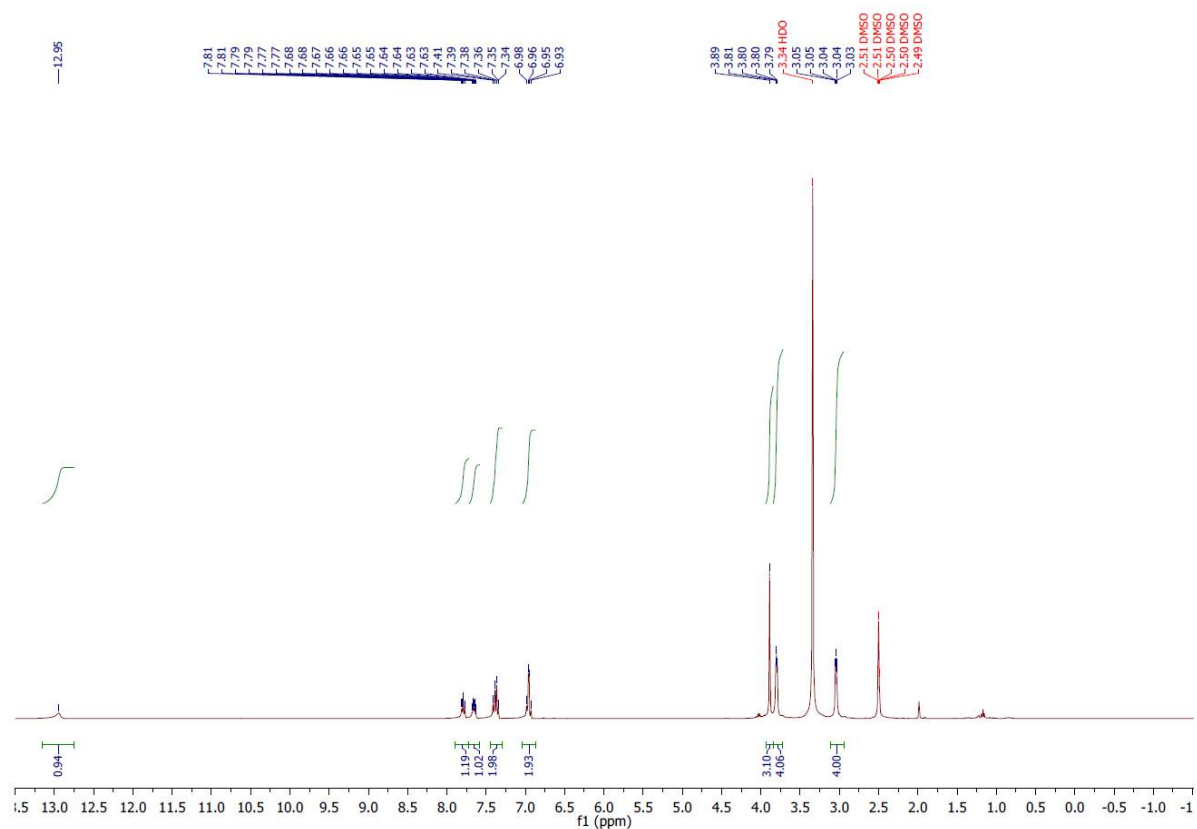

Figure S12: <sup>1</sup>H-NMR of TOZ6.

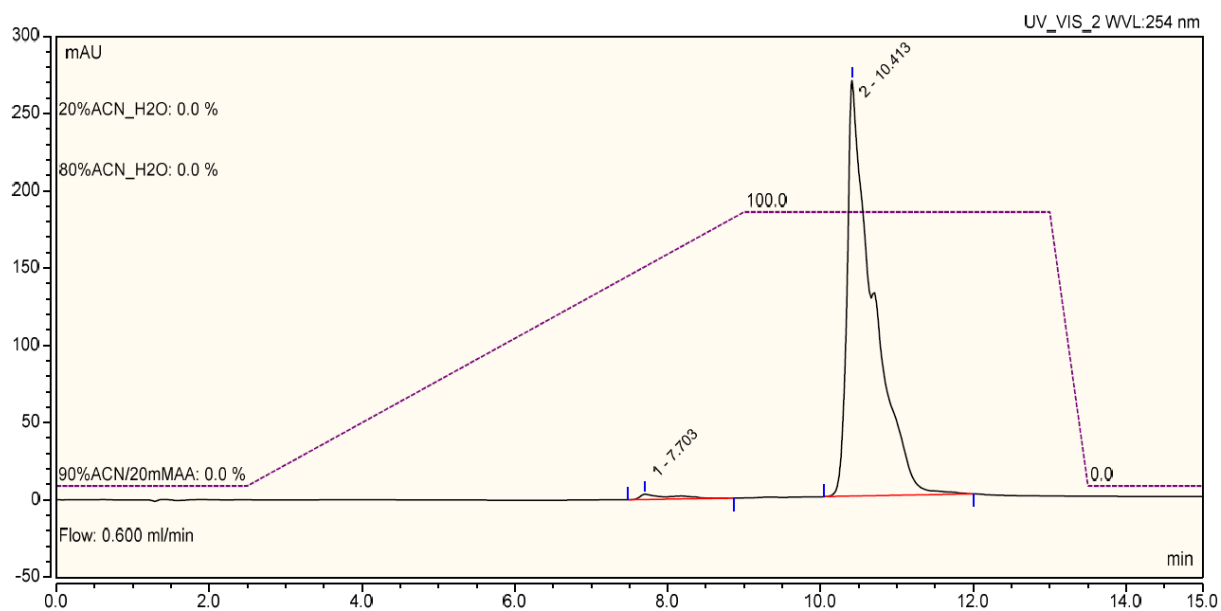

Figure S13: LC-MS chromatogram of TOZ6.

### 4-Fluoro-*N*-(4-methoxy-7-morpholinobenzo[*d*]thiazol-2-yl)-3-nitrobenzamide (TOZ7)

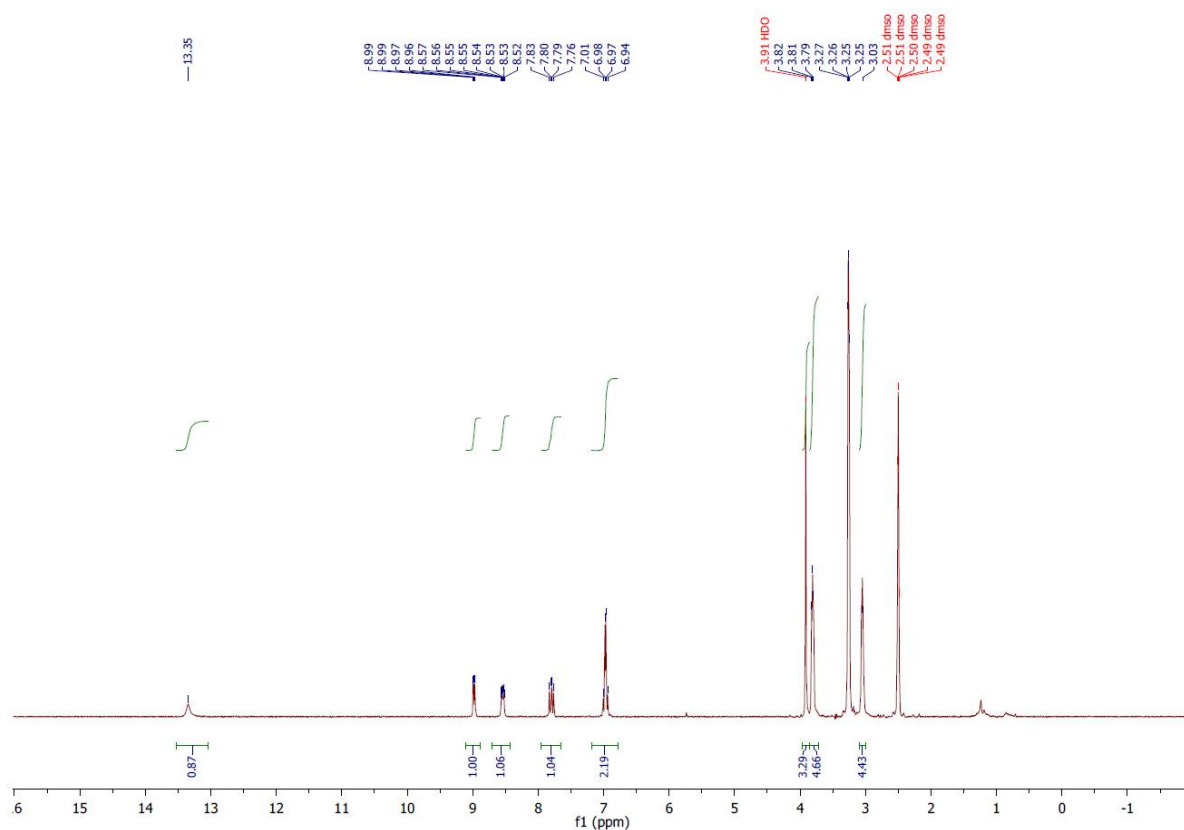

Figure S14: <sup>1</sup>H-NMR of TOZ7.

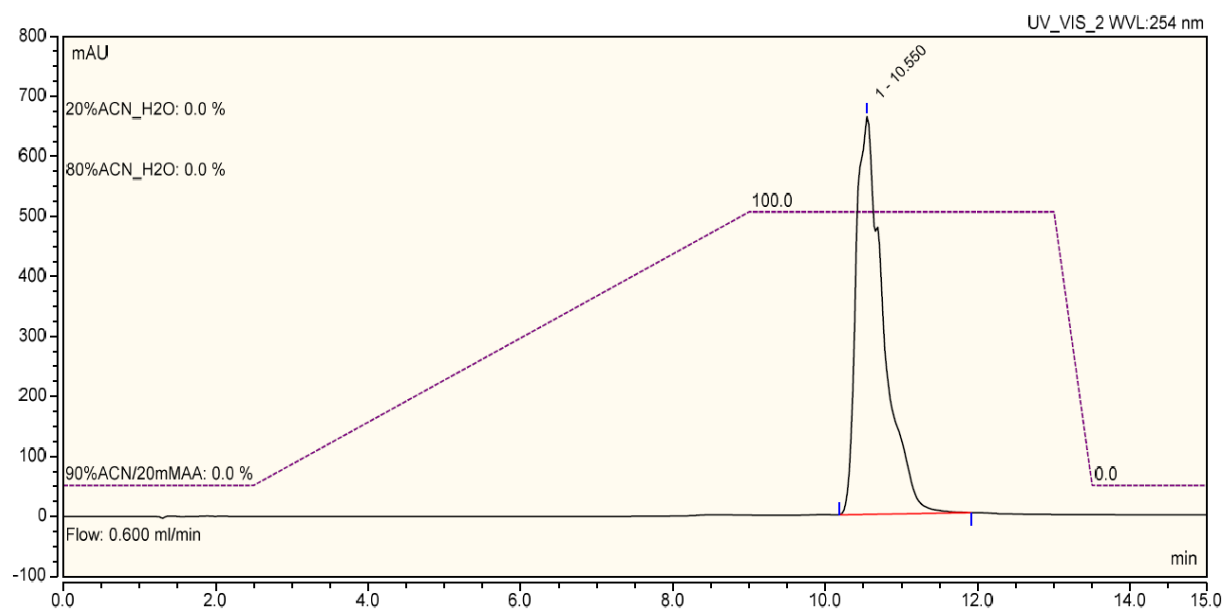

Figure S15: LC-MS chromatogram of TOZ7.
